# Supplementary material
Source: MDPI journal article supplement (https://www.mdpi.com/2304-6732/11/3/265)
Supplement: s1 [file s1]

Archive with 1 entries (1 files):
- photonics-2865074-supplementary.pdf
